# Supplementary material for: Safety of Anthroposophic Medicinal Products: An Analysis of Adverse Drug Reactions from German Pharmacovigilance Databases
Source: PubMed Central journal article supplement — Drugs Real World Outcomes. 2021 Jul 28;8(4):589–601. doi: 10.1007/s40801-021-00262-7 (PMC8605942; doi:10.1007/s40801-021-00262-7), 2021-07-28
Supplement: 40801_2021_262_MOESM1_ESM.pdf [file 40801_2021_262_MOESM1_ESM.pdf]

## **Safety of Anthroposophic Medicinal Products: An Analysis of Adverse Drug Reactions from German Pharmacovigilance Databases**

Safety analysis of anthroposophic medicinal products

Miek C. Jong (ORCID 0000-0001-8523-9632)<sup>1</sup>, Herman van Wietmarschen (ORCID 0000-0003-2225-0337)<sup>1,2</sup>, Anja Glockmann (ORCID 0000-0003-2257-3507)<sup>1,3</sup>, Erik W. Baars (ORCID 0000-0003-4428-5135)<sup>1,2,4</sup>, Harald J. Hamre (ORCID 0000-0003-1098-1079)<sup>1,3,5</sup>

<sup>1</sup> ESCAMP – European Scientific Cooperative on Anthroposophic Medicinal Products, Zechenweg 6, D-79111 Freiburg, Germany

<sup>2</sup> Louis Bolk Institute, Hoofdstraat 24, NL-3972 LA Driebergen, The Netherlands

<sup>3</sup> Institute for Applied Epistemology and Medical Methodology at the Witten/Herdecke University, Zechenweg 6, D-79111 Freiburg, Germany

<sup>4</sup> University of Applied Sciences Leiden, Zernikedreef 11, NL-2333 CK Leiden, The Netherlands

<sup>5</sup> Faculty of Health, Witten/Herdecke University, Gerhard-Kienle-Weg 4, D-58313 Herdecke, Germany

**Table S1. Characteristics of labelled versus unlabelled Adverse Drug Reactions**

| Characteristic                   | Labelled |        | Unlabelled |        | Other |        |
|----------------------------------|----------|--------|------------|--------|-------|--------|
|                                  | N        | %      | N          | %      | N     | %      |
| <b>Seriousness*</b>              |          |        |            |        |       |        |
| Serious                          | 41       | 1.2%   | 57         | 3.1%   | 6     | 2.5%   |
| Not serious                      | 3300     | 98.8%  | 1793       | 96.9%  | 235   | 97.5%  |
| Total                            | 3341     | 100.0% | 1850       | 100.0% | 241   | 100.0% |
| <b>Gender</b>                    |          |        |            |        |       |        |
| Male                             | 544      | 16.4%  | 285        | 15.6%  | 57    | 19.3%  |
| Female                           | 2782     | 83.6%  | 1543       | 84.4%  | 239   | 80.7%  |
| Total                            | 3326     | 100.0% | 1828       | 100.0% | 296   | 100.0% |
| <b>Age groups*</b>               |          |        |            |        |       |        |
| Neonate (0-27 days)              | 7        | 0.2%   | 14         | 0.9%   | 11    | 4.1%   |
| Infant (28 days-23 months)       | 69       | 2.4%   | 79         | 5.1%   | 52    | 19.5%  |
| Child (2-11 years)               | 143      | 5.0%   | 74         | 4.8%   | 17    | 6.4%   |
| Adolescent (12-18 years)         | 22       | 0.8%   | 30         | 2.0%   | 5     | 1.9%   |
| Adult (19-64 years)              | 1984     | 69.2%  | 954        | 62.1%  | 121   | 45.5%  |
| Elderly (65 years and older)     | 641      | 22.4%  | 385        | 25.1%  | 60    | 22.6%  |
| Total                            | 2866     | 100.0% | 1536       | 100.0% | 266   | 100.0% |
| <b>Outcome*</b>                  |          |        |            |        |       |        |
| Recovered/resolved               | 2282     | 85.5%  | 1291       | 87.7%  | 159   | 59.6%  |
| Recovering/resolving             | 224      | 8.4%   | 72         | 4.9%   | 21    | 7.9%   |
| Not recovered/not resolved       | 159      | 6.0%   | 99         | 6.7%   | 8     | 3.0%   |
| Not applicable <sup>a</sup>      | 0        | 0.0%   | 6          | 0.4%   | 71    | 26.6%  |
| Recovered/resolved with sequelae | 3        | 0.1%   | 4          | 0.3%   | 6     | 2.2%   |
| Sequelae                         | 1        | 0.0%   | 0          | 0.0%   | 0     | 0.0%   |
| Not assessable                   | 0        | 0.0%   | 0          | 0.0%   | 2     | 0.7%   |
| Total                            | 2669     | 100.0% | 1472       | 100.0% | 267   | 100.0% |
| <b>Route of administration*</b>  |          |        |            |        |       |        |
| Injections                       | 1095     | 32.8%  | 374        | 20.2%  | 67    | 22.1%  |
| Oral                             | 291      | 8.7%   | 714        | 38.5%  | 55    | 18.2%  |
| Topical                          | 1956     | 58.5%  | 766        | 41.3%  | 181   | 59.7%  |
| Total                            | 3342     | 100.0% | 1854       | 100.0% | 303   | 100.0% |
| <b>Concentrations AMPs</b>       |          |        |            |        |       |        |
| Non-diluted                      | 2665     | 79.8%  | 923        | 49.8%  | 204   | 67.3%  |
| D1-D3 dilution                   | 531      | 15.9%  | 526        | 28.4%  | 40    | 13.2%  |
| ≥ D4 dilution                    | 77       | 2.3%   | 326        | 17.6%  | 28    | 9.2%   |
| Mixture of dilutions             | 68       | 2.0%   | 77         | 4.2%   | 31    | 10.2%  |
| Total                            | 3341     | 100.0% | 1852       | 100.0% | 303   | 100.0% |

<sup>a</sup>Not applicable: incorrect use of the AMP, the ADR was reported in terms of lack of effect or similar, or the ADR was evaluated to be causally linked to another AMP that was concomitantly administered in that patient.

\* distributions labelled versus unlabelled are significantly different (p<0.0001. Chi-square test)

| Characteristic                                          | Labelled |        | Unlabelled |        | Other |        |
|---------------------------------------------------------|----------|--------|------------|--------|-------|--------|
|                                                         | N        | %      | N          | %      | N     | %      |
| <b>Starting material</b>                                |          |        |            |        |       |        |
| Botanical                                               | 1776     | 53.2%  | 750        | 40.5%  | 154   | 50.2%  |
| Zoological                                              | 2        | 0.1%   | 84         | 4.5%   | 6     | 2.0%   |
| Chemical                                                | 13       | 0.4%   | 33         | 1.8%   | 5     | 1.6%   |
| Mineral                                                 | 3        | 0.1%   | 6          | 0.3%   | 3     | 1.0%   |
| Vegitabilized metal                                     | 0        | 0.0%   | 18         | 1.0%   | 0     | 0.0%   |
| More than one starting material                         | 938      | 28.1%  | 603        | 32.6%  | 105   | 34.2%  |
| Compositions                                            | 609      | 18.2%  | 358        | 19.3%  | 34    | 11.1%  |
| Totals                                                  | 3341     | 100.0% | 1852       | 100.0% | 307   | 100.0% |
| <b>System Organ Class*</b>                              |          |        |            |        |       |        |
| 1. Blood and lymphatic system disorders                 | 2        | 0.1%   | 9          | 0.5%   | 0     | 0.0%   |
| 2. Cardiac disorders                                    | 2        | 0.1%   | 67         | 3.6%   | 1     | 0.3%   |
| 3. Ear and labyrinth disorders                          | 2        | 0.1%   | 27         | 1.5%   | 1     | 0.3%   |
| 4. Endocrine disorders                                  | 0        | 0.0%   | 2          | 0.1%   | 0     | 0.0%   |
| 5. Eye disorders                                        | 696      | 20.8%  | 325        | 17.5%  | 9     | 2.9%   |
| 6. Gastrointestinal disorders                           | 123      | 3.7%   | 302        | 16.3%  | 23    | 7.4%   |
| 7. General disorders and administration site conditions | 1515     | 45.4%  | 304        | 16.4%  | 75    | 24.2%  |
| 8. Hepatobiliary disorders                              | 2        | 0.1%   | 6          | 0.3%   | 0     | 0.0%   |
| 9. Immune system disorders                              | 58       | 1.7%   | 29         | 1.6%   | 8     | 2.6%   |
| 10. Infections and infestations                         | 15       | 0.4%   | 25         | 1.3%   | 6     | 1.9%   |
| 11. Injury, poisoning and procedural complications      | 2        | 0.1%   | 22         | 1.2%   | 92    | 29.7%  |
| 12. Investigations                                      | 10       | 0.3%   | 33         | 1.8%   | 6     | 1.9%   |
| 13. Metabolism and nutrition disorders                  | 0        | 0.0%   | 8          | 0.4%   | 0     | 0.0%   |
| 14. Musculoskeletal and connective tissue disorders     | 8        | 0.2%   | 33         | 1.8%   | 4     | 1.3%   |
| 15. Nervous system disorders                            | 95       | 2.8%   | 115        | 6.2%   | 7     | 2.3%   |
| 16. Pregnancy, puerperium and perinatal conditions      | 0        | 0.0%   | 1          | 0.1%   | 1     | 0.3%   |
| 17. Psychiatric disorders                               | 3        | 0.1%   | 113        | 6.1%   | 6     | 1.9%   |
| 18. Renal and urinary disorders                         | 0        | 0.0%   | 13         | 0.7%   | 0     | 0.0%   |
| 19. Reproductive system and breast disorders            | 16       | 0.5%   | 19         | 1.0%   | 2     | 0.6%   |
| 20. Respiratory, thoracic and mediastinal disorders     | 96       | 2.9%   | 108        | 5.8%   | 17    | 5.5%   |
| 21. Skin and subcutaneous tissue disorders              | 684      | 20.5%  | 252        | 13.6%  | 45    | 14.5%  |
| 22. Surgical and medical procedures                     | 0        | 0.0%   | 3          | 0.2%   | 2     | 0.6%   |
| 23. Vascular disorders                                  | 11       | 0.3%   | 36         | 1.9%   | 4     | 1.3%   |
| 24. Product issues                                      | 0        | 0.0%   | 0          | 0.0%   | 1     | 0.3%   |
| Totals                                                  | 3340     | 100.0% | 1852       | 100.0% | 310   | 100.0% |

\* distributions labelled versus unlabelled are significantly different (p<0.0001. Chi-square test)
